# Supplementary material for: Elaeocarpus tectorius derived phosphorus-doped carbon as an electrode material for an asymmetric supercapacitor
Source: Royal Society of Chemistry journal article supplement (doi:10.1039/c9nj04813h), 2019-11-20
Supplement: c9nj04813h1.pdf [file c9nj04813h1.pdf]

## Supporting Information

### **Elaeocarpus Tectorius derived Phosphorus-doped Carbon as an electrode material for Asymmetric Supercapacitor**

<sup>a</sup>B. Nirosha, <sup>a</sup>R. Selvakumar, <sup>b</sup>J. Jeyanthi, <sup>c</sup>S. Vairam\*

<sup>a</sup>*Department of Chemistry, Government College of Technology, Coimbatore-641013, India.*

<sup>b</sup>*Centre of Excellence for Environmental Studies (COE-ES), Government College of Technology, Coimbatore-641013, India.*

<sup>a,c</sup>*Department of Chemistry, KPR Institute of Engineering and Technology, Coimbatore-641407, India.*

#### **Corresponding Author Information:**

❖ Email Address: [drsvairam@rediffmail.com](mailto:drsvairam@rediffmail.com); [yamshen@yahoo.com](mailto:yamshen@yahoo.com) (S. Vairam).

**Fig.S1:** TG-DTA of ETC-900 in Air atmosphere.

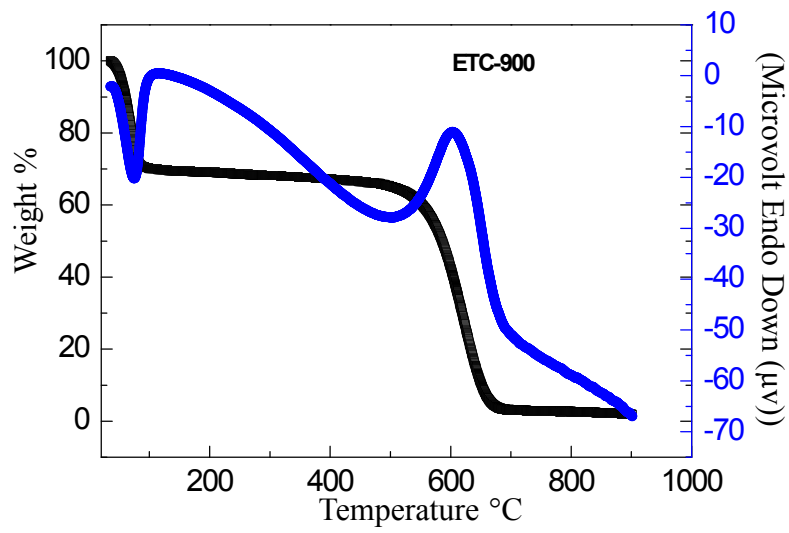

**Fig.S2:** SEM-EDAX profile of ETC-900.

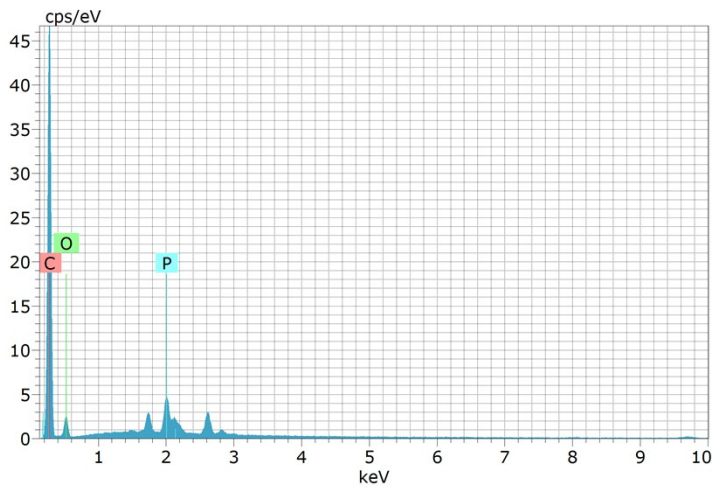

**Fig.S3:** (a) and (b) CV and CD profiles of ETC-800; (c) and (d) ETC-700.

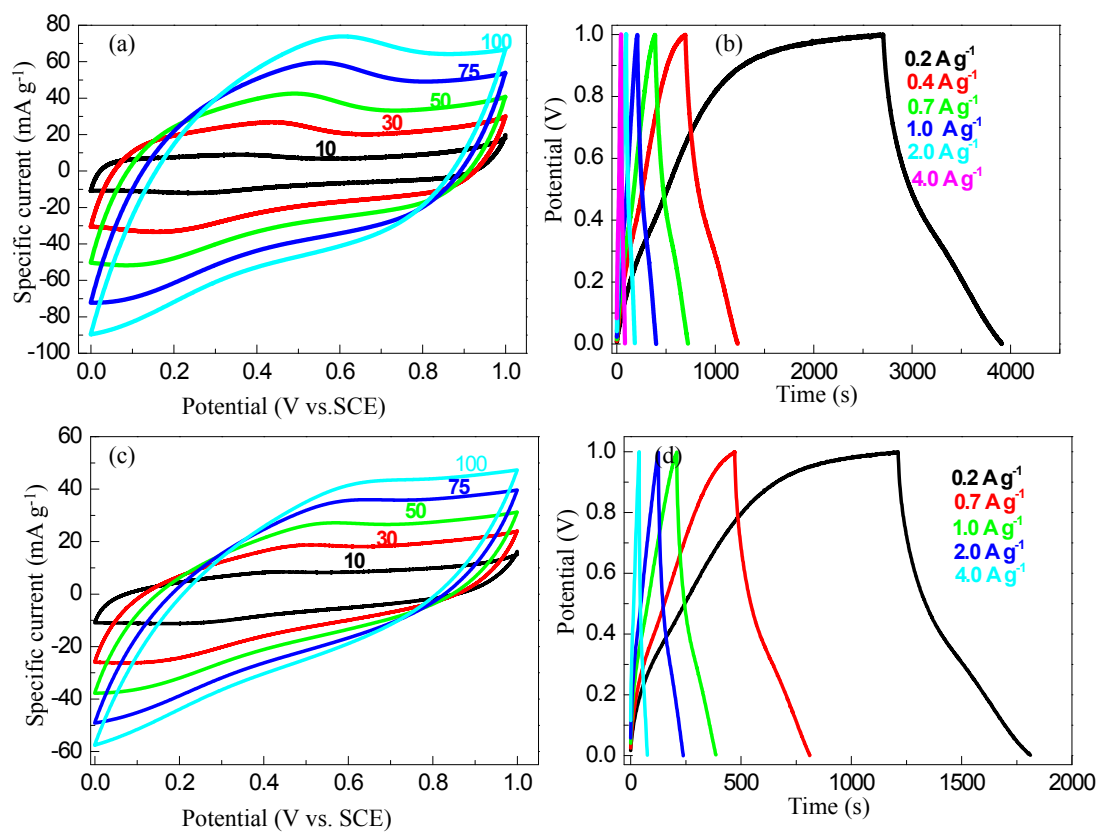

**Table S1:** Volumetric and Gravimetric capacitances of ETC-900 in 1M H<sub>2</sub>SO<sub>4</sub>

| Volumetric capacitance<br>(F cm <sup>-3</sup> ) | Gravimetric capacitance<br>(F g <sup>-1</sup> ) | Current density<br>(A g <sup>-1</sup> ) |
|-------------------------------------------------|-------------------------------------------------|-----------------------------------------|
| 543                                             | 385                                             | 0.2                                     |
| 353                                             | 250                                             | 0.7                                     |
| 283                                             | 201                                             | 1.0                                     |
| 266                                             | 189                                             | 2.0                                     |
| 244                                             | 173                                             | 5.0                                     |
| 186                                             | 132                                             | 10                                      |

**Table S2:** Volumetric and Gravimetric capacitances of ETC-900 in 1M Na<sub>2</sub>SO<sub>4</sub>

| Volumetric capacitance<br>(F cm <sup>-3</sup> ) | Gravimetric capacitance<br>(F g <sup>-1</sup> ) | Current density<br>(A g <sup>-1</sup> ) |
|-------------------------------------------------|-------------------------------------------------|-----------------------------------------|
| 286                                             | 203                                             | 0.3                                     |
| 274                                             | 195                                             | 0.6                                     |
| 267                                             | 190                                             | 1.3                                     |
| 240                                             | 170                                             | 3.0                                     |
| 225                                             | 160                                             | 6.3                                     |
| 187                                             | 133                                             | 10                                      |
